# Supplementary material for: Composition of gut microbiota in infants in China and global comparison
Source: PubMed Central journal article supplement (PMC5101483; doi:10.1038/srep36666), 2016-11-09
Supplement: srep36666-s1.pdf [file srep36666-s1.pdf]

## Composition of gut microbiota in infants in China and global comparison

Ya-Shu Kuang<sup>1\*</sup>, Sheng-Hui Li<sup>1\*</sup>, Yong Guo<sup>1\*</sup>, Jin-Hua Lu<sup>1</sup>, Jian-Rong He<sup>1</sup>, Bei-Jun Luo<sup>2</sup>, Feng-Ju Jiang<sup>2</sup>, Hui Shen<sup>3</sup>, Christopher J Papasian<sup>4</sup>, Herbert Pang<sup>5</sup>, Hui-Min Xia<sup>1,6†</sup>, Hong-Wen Deng<sup>3</sup>, Xiu Qiu<sup>1,7†</sup>

<sup>1</sup>Division of Birth Cohort Study, Guangzhou Women and Children's Medical Center, Guangzhou Medical University, Guangzhou 510623, People's Republic of China

<sup>2</sup> Department of Obstetrics, Guangzhou Women and Children's Medical Center, Guangzhou Medical University, Guangzhou 510623, People's Republic of China

<sup>3</sup>Center of Bioinformatics and Genomics, Department of Biostatistics and Bioinformatics, Tulane School of Public Health and Tropic Medicine, New Orleans , Louisiana ,USA

<sup>4</sup> Department of Basic Medical Science, School of Medicine, University of Missouri – Kansas City, Kansas City, Missouri, USA

<sup>5</sup>School of Public Health, Li Ka Shing Faculty of Medicine, Hong Kong, China

<sup>6</sup>Department of Neonatal Surgery, Guangzhou Women and Children's Medical Center, Guangzhou Medical University, Guangzhou 510623, China

<sup>7</sup>Department of Woman and Child Health, Guangzhou Women and Children's Medical Center, Guangzhou Medical University, Guangzhou 510623, China

\*The authors contributed equally to this work.

†Correspondence to:

Xiu Qiu, Division of Birth Cohort Study, Guangzhou Women and Children's Medical Center, Guangzhou Medical University, 9 Jinsui Road, Guangzhou 510623, China; Phone: 86 2038367162; Fax: 86 2038367162; E-mail: qxiu0161@163.com.

Hui-Min Xia, Division of Birth Cohort Study, Guangzhou Women and Children's Medical Center, Guangzhou Medical University, 9 Jinsui Road, Guangzhou 510623, China; Phone: 86 2038076019; Fax: 86 2038076019; E-mail: huimin.xia876001@gmail.com.

Figure S1: Bacterial composition, at the phylum level, in infants' gut microbiota from 6 different countries. The world map was generated using R software 3.2.1 package "maps" (<https://cran.r-project.org/web/packages/maps>)<sup>1</sup>

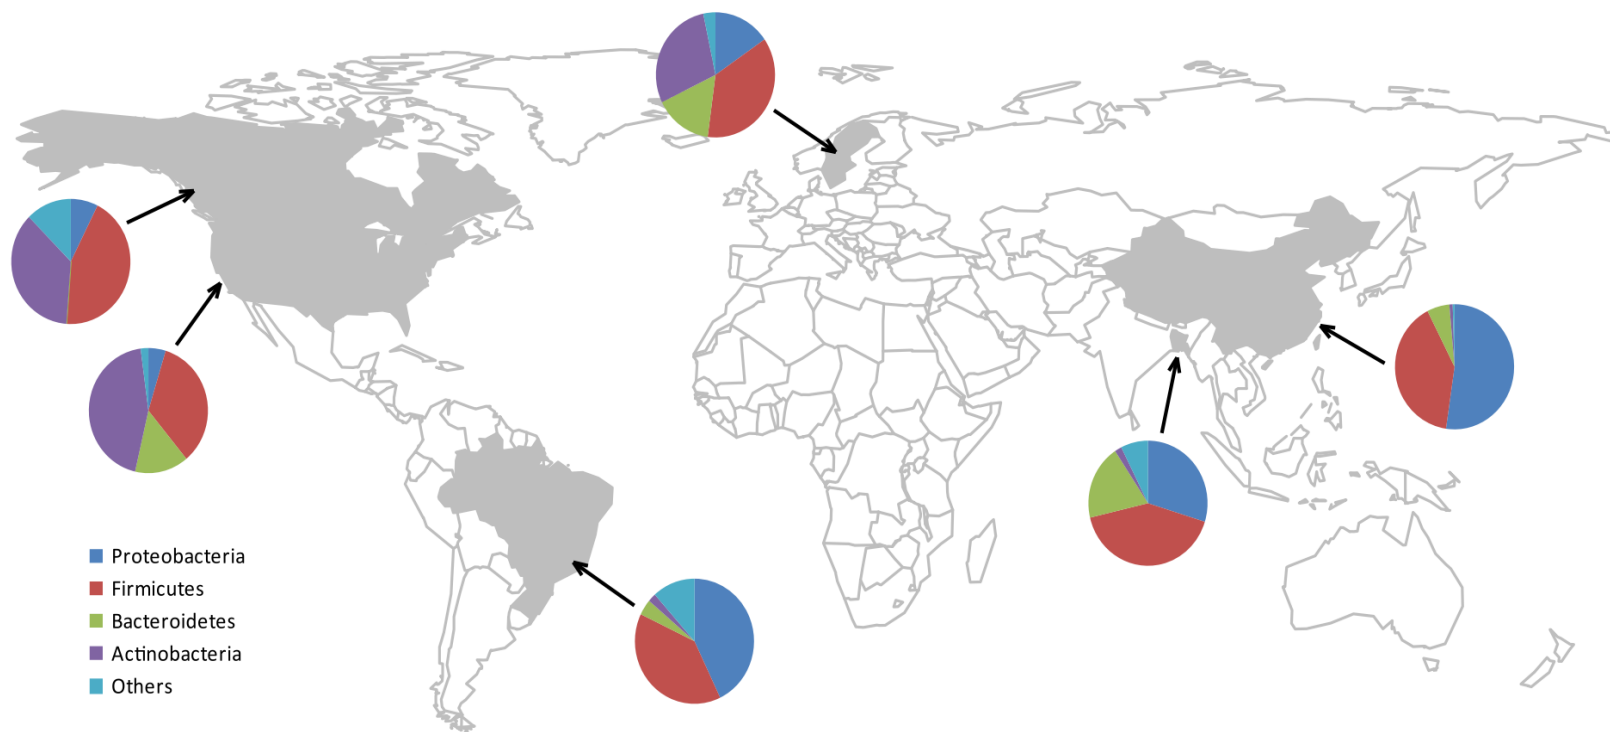

Figure S2: Effects of read depth on principal component analysis of the phylum profiles in infant gut microbiota among 6 countries. (a) (b) Taxonomic relative abundance profiles at the phylum level were also generated based on OTU annotation for each country separately. (c) (d) filtering all OTUs having an abundance lower than 3 reads. (e) (f) and randomly selected 1000 sequences from each sample.

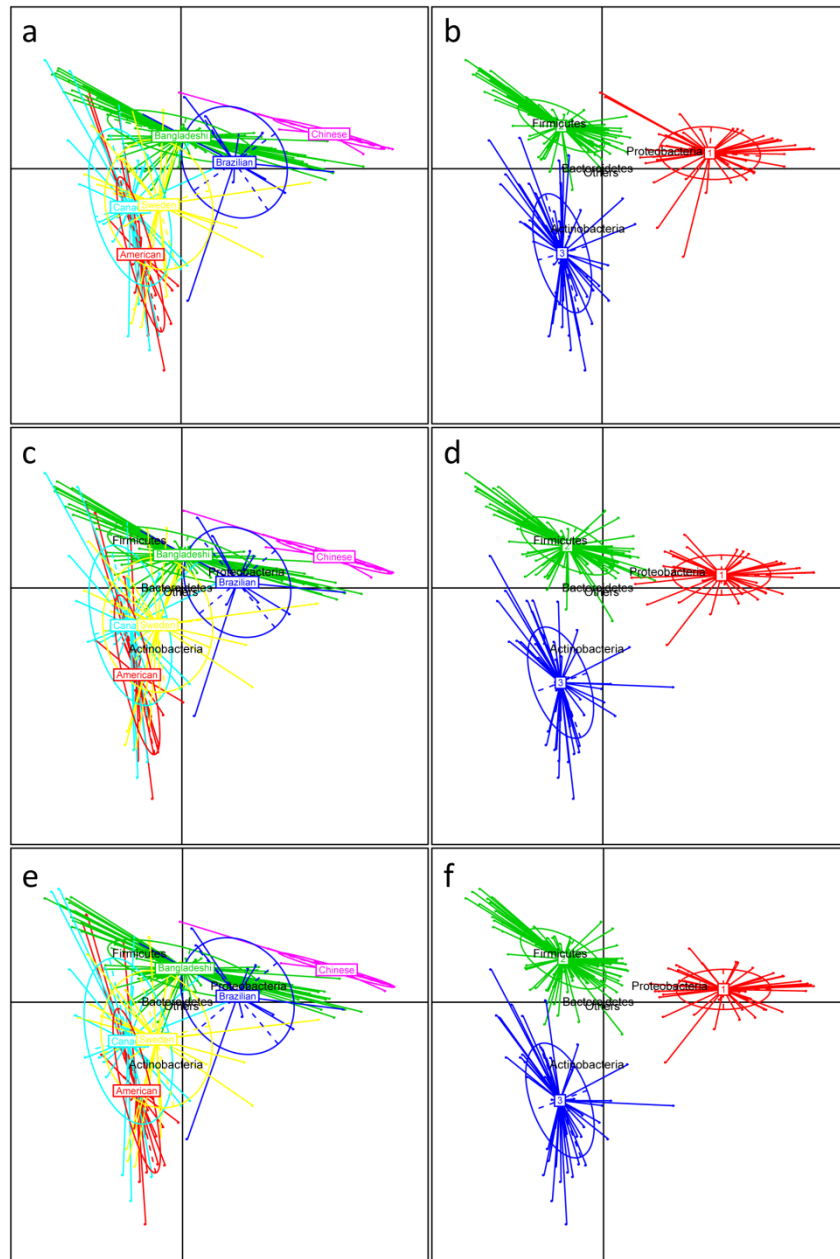

## Reference

1. R Core Team (2013). R: A language and environment for statistical computing. R Foundation for Statistical Computing, Vienna, Austria. URL <http://www.R-project.org/>
